# Supplementary material
Source: MDPI journal article supplement (https://www.mdpi.com/2073-4395/12/10/2564)
Supplement: s1 [file s1]

Supplementary Material for

# Studies on the removal of phenol and nitrophenols from water by activated carbon developed from demineralized kraft lignin

Monika Chaudhary<sup>1,2</sup>, Suhas<sup>1,\*</sup>, Sarita Kushwaha<sup>1</sup>, Shubham Chaudhary<sup>1</sup>, Inderjeet Tyagi<sup>3</sup>, Mohammad Hadi Dehghani<sup>4,5</sup>, Baskaran Stephen Inbaraj<sup>6,\*</sup>, Joanna Goscianska<sup>7</sup> and Minaxi Sharma<sup>8</sup>

<sup>1</sup>Department of Chemistry, Gurukula Kangri (Deemed to be University), Haridwar – 249404, India

<sup>2</sup>Department of Chemistry, Hariom Saraswati P.G. College, Dhanauri-247667, Haridwar, India

<sup>3</sup>Centre for DNA Taxonomy, Molecular Systematics Division, Zoological Survey of India, Kolkata-700 053, India

<sup>4</sup>Department of Environmental Health Engineering, School of Public Health, Tehran University of Medical Sciences, Tehran 9821, Iran

<sup>5</sup>Institute for Environmental Research, Center for Solid Waste Research, Tehran University of Medical Sciences, Tehran 9821, Iran

<sup>6</sup>Department of Food Science, Fu Jen Catholic University, New Taipei City 24205, Taiwan

<sup>7</sup>Adam Mickiewicz University in Poznań, Faculty of Chemistry, Department of Chemical Technology, Uniwersytetu Poznańskiego 8, 61-614 Poznań, Poland

<sup>8</sup>Department of Applied Biology, University of Science and Technology, Ri-Bhoi, Meghalaya 793101, India

\* Correspondence: suhasnatyan@yahoo.com (S.); sinbaraj@yahoo.com (B.S.I.)

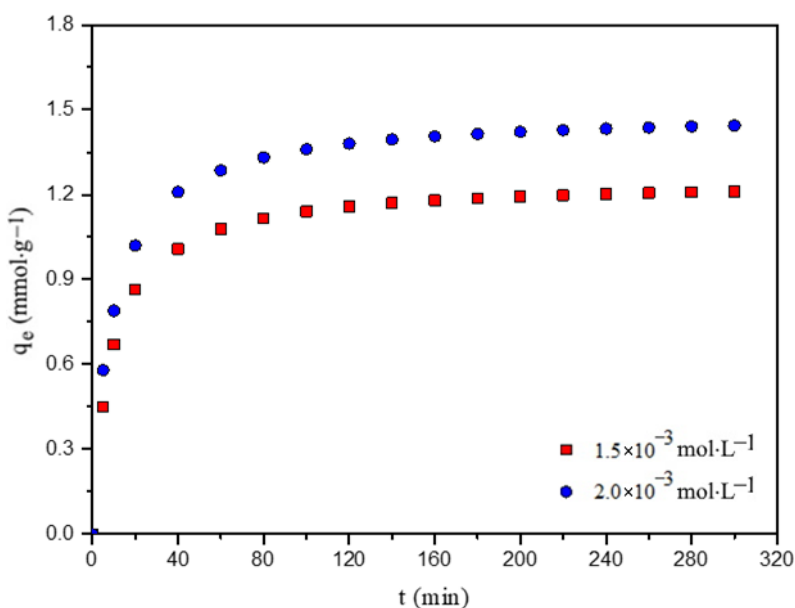

**Figure S1.** Effect of initial concentration for the removal of phenol by demineralized kraft lignin activated carbon (DKLAAC) at different initial concentrations at 25°C.

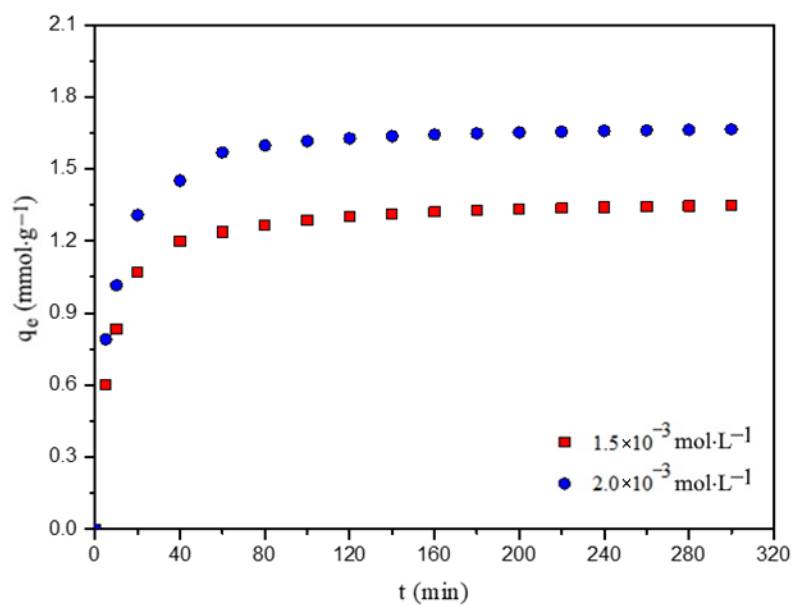

**Figure S2.** Effect of initial concentration for the removal of 4-nitrophenol (4-NP) by DKLAAC at different initial concentrations at 25°C.

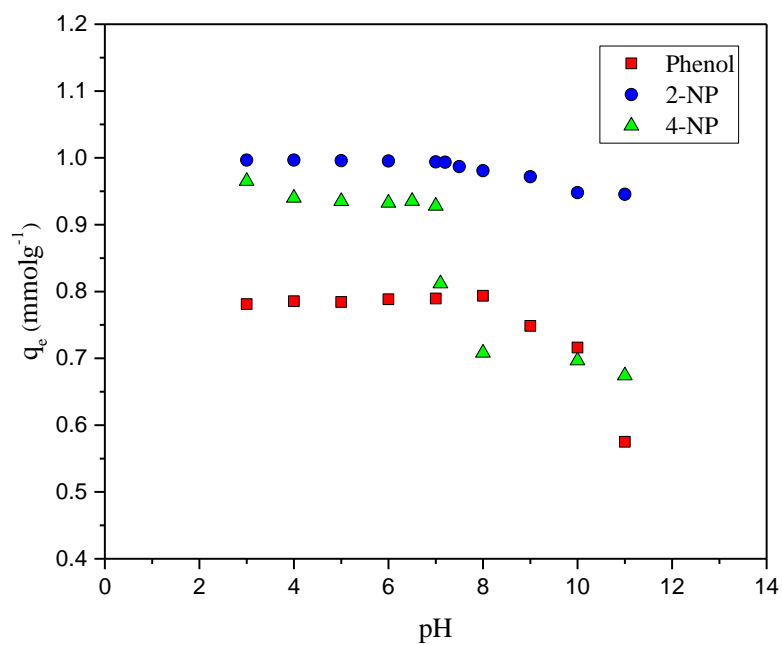

**Figure S3.** Effect of pH on the adsorption of phenol, 2-NP and 4-NP on DKLAAC at 25°C with initial phenol concentration at 1 × 10<sup>-3</sup> M.

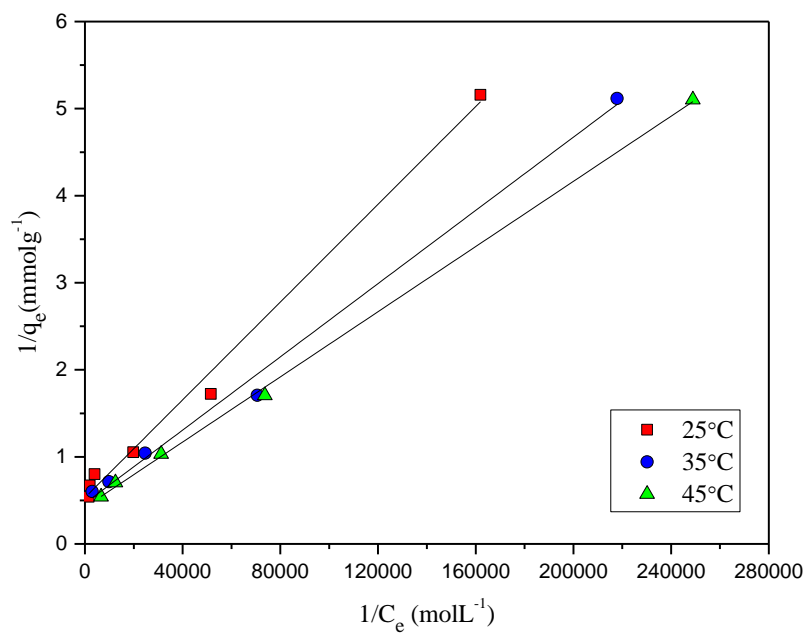

**Figure S4.** Langmuir adsorption isotherms of phenol on DKLAAC at different temperatures

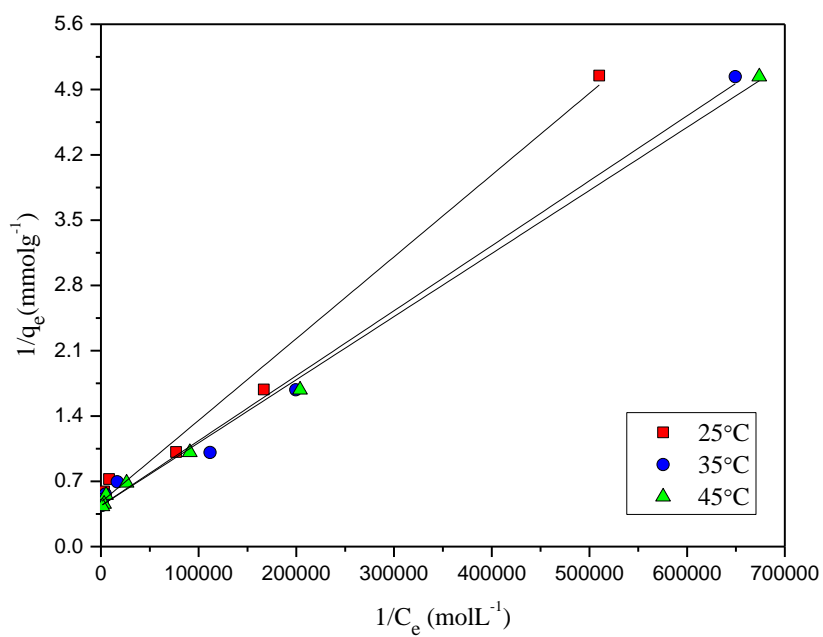

**Figure S5.** Langmuir adsorption isotherms of 4-NP on DKLAAC at different temperatures.

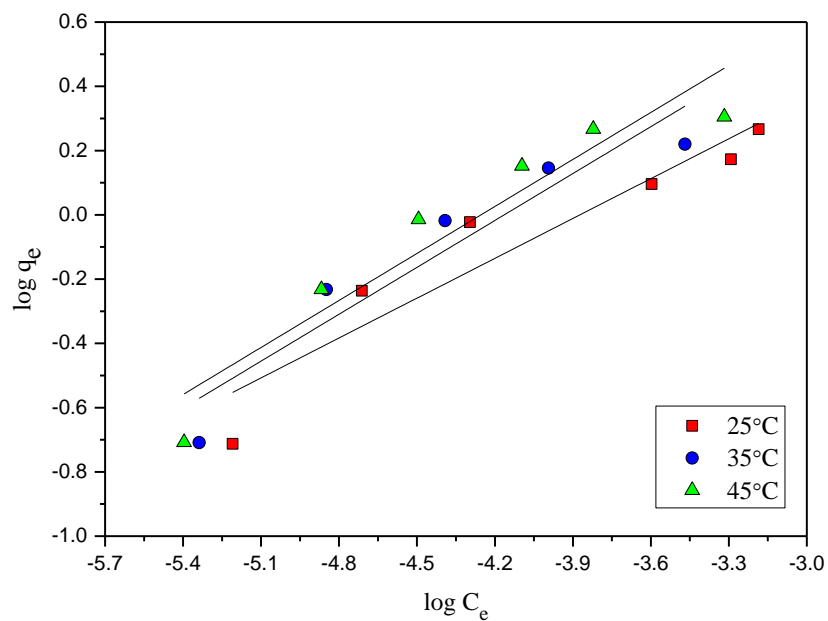

**Figure S6.** Freundlich adsorption isotherms of phenol on DKLAAC at different temperatures.

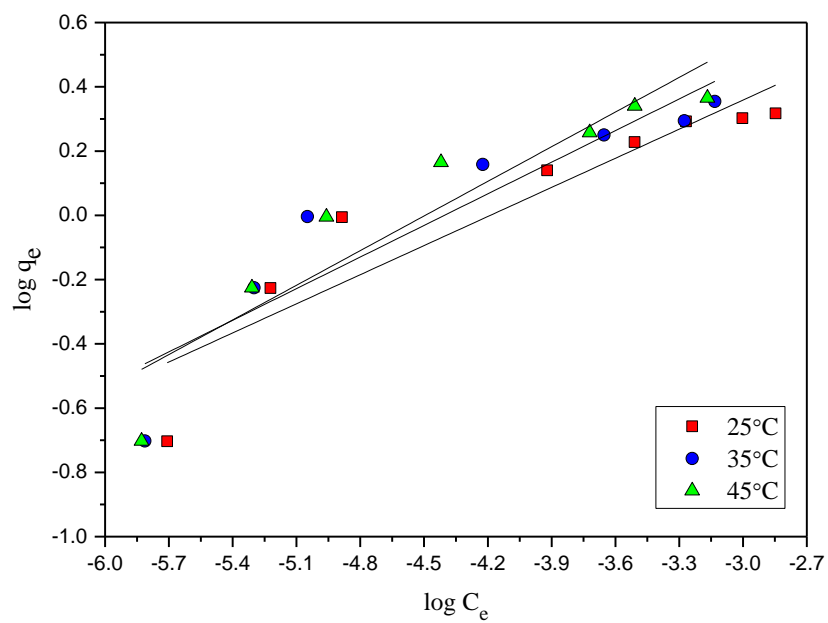

**Figure S7.** Freundlich adsorption isotherms of 4-NP on DKLAAC at different temperatures.

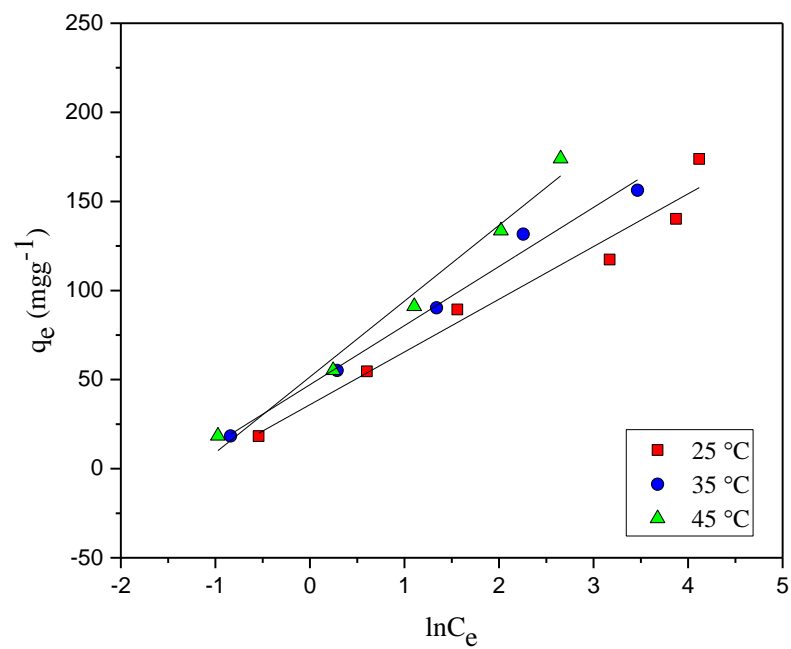

**Figure S8.** Temkin adsorption isotherms of phenol on DKLAAC at different temperatures.

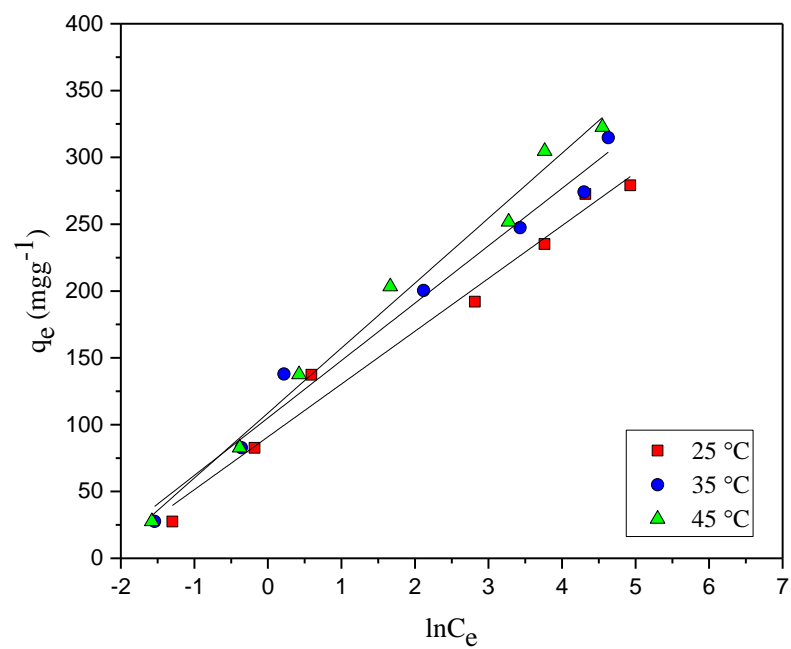

**Figure S9.** Temkin adsorption isotherms of 4-NP on DKLAAC at different temperatures.

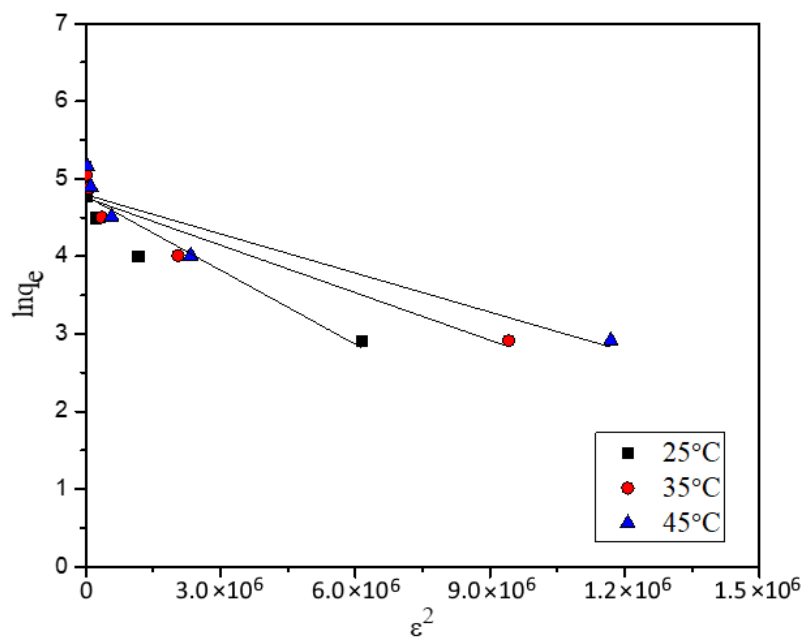

Figure S10. D-R adsorption isotherms of phenol on DKLAAC at different temperatures.

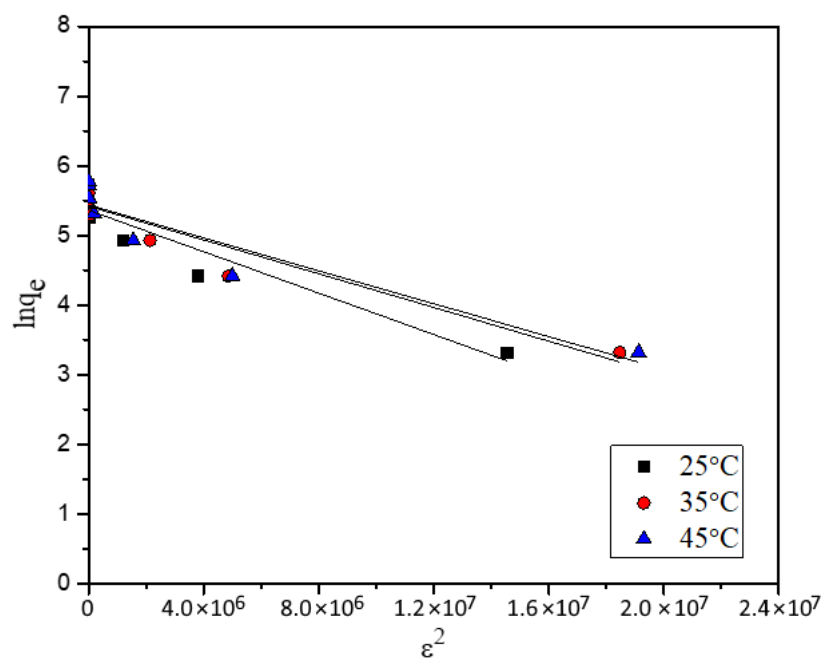

Figure S11. D-R adsorption isotherms of 4-NP on DKLAAC at different temperatures.
